# Supplementary material for: A maximum of two readily releasable vesicles per docking site at a cerebellar single active zone synapse
Source: eLife. 2024 Jan 5;12:RP91087. doi: 10.7554/eLife.91087 (PMC10963025; doi:10.7554/eLife.91087)
Supplement: Figure 2—source data 1. — This Excel Table lists si results in control, after 4-amidopyridine (4-AP) infusion, and after post-tetanic potentiation (PTP) induction, for the 14 individual experiments used in the present work (group results shown in Figure 2B). It also shows Pi results in the same conditions (group results shown in Figures 2C and 6), as well as P1 + P2 results (group results displayed in Figure 4). Finally, it shows 200 Hz results for a subset of experiments (group results shown in Figure 5). [file elife-91087-fig2-data1.xlsx]

## Sheet: Sheet 1
Table 1
Name	N	Control		4-AP		PTP			200Hz
		S1	S2	S1	S2	S1	S2	Cell Number	S1	S2	1+2 in 200hz	Sv/DS
Jun03a	4	1.917	1.667	2.615	1.962			0
May12a	6	2.533	3.2	4.533	4.267	4.833	4.6	1
May11a	3	0.967	1.333	1.75	2.25			2
Apr21b	2	1.5	1.633	1.65	1.684			3
Apr12a	4	2.067	2.1	2.3	2.7			4					AVG 200HZ	SEM
Jul05b	4	1.48	2.36	2.467	3.2	2.867	3.067	5	3.65	2.74	6.4	1.6	1.45445	0.0796959
Jul09b	2	0.367	0.467	1.267	1.233			6
Jul1221a	3	1.133	1.367	1.571	1.821			7
Ag1721a	4	1.45	1.9	2.4	2.3	3.39	2.47	8	3.167	3.25	6.417	1.604
Ag2521a	3	0.967	0.933	2.65	1.4	2.867	1.733	9
Sep1621b	3	1	1.3	1.867	1.8	2.967	1.217	10	2.867	1.5	4.367	1.456
Sep3021b	4	1.115	1.769	3.563	2.938	3.3	2.8	11	2.889	2	4.889	1.22225		200 Hz P2
Oct0721b	5	1.897	1.828	3.867	2.333	4.367	3.067	12	3.85	3.1	6.95	1.39		0.685
Oct2121b	4	1.267	1.833	3	2.76	3.95	3.5	13						0.8125
														0.5
														0.5
														0.62
													Avg P2 200 hz	0.6235
Normalized to DS													SEM	0.0661532
Name	N	Control		4-AP		PTP					AVERAGE	SEM
		S1	S2	S1	S2	S1	S2	Cell Number		Ctrl S1	0.386689	0.036802
Jun03a	4	0.47925	0.41675	0.65375	0.4905			0		Ctrl S2	0.464281	0.0376192
May12a	6	0.422167	0.533333	0.7555	0.711167	0.8055	0.766667	1		4-AP S1	0.691874	0.0331454
May11a	3	0.322333	0.444333	0.583333	0.75			2		4-AP S2	0.644674	0.0331699
Apr21b (manual S2 for 4AP)	2	0.75	0.8165	0.825	0.842			3		PTP S1	0.87504	0.0365031
Apr12a	4	0.51675	0.525	0.575	0.675			4		PTP S2	0.665373	0.0645069
Jul05b	4	0.37	0.59	0.61675	0.8	0.71675	0.76675	5
Jul09b	2	0.1835	0.2335	0.6335	0.6165			6
Jul1221a	3	0.377667	0.455667	0.523667	0.607			7
Ag1721a	4	0.3625	0.475	0.6	0.575	0.8475	0.6175	8
Ag2521a	3	0.322333	0.311	0.883333	0.466667	0.955667	0.577667	9
Sep1621b	3	0.333	0.433	0.622	0.6	0.989	0.406	10
Sep3021b	4	0.278	0.442	0.891	0.735	0.825	0.7	11
Oct0721b	5	0.3794	0.3656	0.7734	0.4666	0.8734	0.6134	12
Oct2121b	4	0.31675	0.45825	0.75	0.69	0.9875	0.875	13
										AVERAGE	SEM
Normalized S1+S2	DS	Control	4-AP	PTP					Ctrl S1+S2	0.851027	0.0712389
Jun03a	4	0.896	1.14425						4-AP S1+S2	1.33648	0.0467618
May12a	6	0.9555	1.46667	1.57217					PTP S1+S2	1.54039	0.0530696
May11a	3	0.766667	1.33333
Apr21b (manual S2 for 4AP)	2	1.5665	1.667
Apr12a	4	1.04175	1.25
Jul05b	4	0.96	1.41675	1.4835
Jul09b	2	0.417	1.25
Jul1221a	3	0.833333	1.13067
Ag1721a	4	0.8375	1.175	1.465
Ag2521a	3	0.633333	1.35	1.53333
Sep1621b	3	0.766	1.222	1.395
Sep3021b	4	0.721	1.625	1.525
Oct0721b	5	0.7448	1.24	1.4866
Oct2121b	4	0.775	1.44	1.8625
